# Supplementary material for: Extractive desulfurization of fuel oils with low-viscosity dicyanamide-based ionic liquids
Source: Royal Society of Chemistry journal article supplement (doi:10.1039/c0gc00118j), 2010-01-01
Supplement: c0gc00118j.pdf [file c0gc00118j.pdf]

## Supporting Information

### FT-IR and <sup>1</sup>H NMR Spectral of ILs

#### a) [EMI][N(CN)<sub>2</sub>]

**IR (KBr):** 3151.1s, 3107.1s, 2989.1s( $V_{C-H}$ ), 2235.5s, 2196.0s, 2134.8vs ( $V_{CN}$ )  $cm^{-1}$ .

**<sup>1</sup>H NMR, (600MHz, d<sub>6</sub>-DMSO):**  $\delta$  9.07(s, N-CH-N), 7.75(s, CH), 7.66(s, CH), 4.19(q, N-CH<sub>2</sub>), 3.84(s, N-CH<sub>3</sub>), 1.42(t, CH<sub>3</sub>) ppm.

#### b) [BMI][N(CN)<sub>2</sub>]

**IR (KBr):** 3149.8w, 3106.6w, 2962.5m, 2936.6w, 2875.0w ( $V_{C-H}$ ), 2237.6s, 2197.2 s, 2135.7 vs ( $V_{CN}$ )  $cm^{-1}$ .

**<sup>1</sup>H NMR, (600MHz, d<sub>6</sub>-DMSO):**  $\delta$  9.15(s, N-CH-N), 7.79(s, N-CH-C), 7.72(s, C-CH-N), 4.36(t, N-CH<sub>2</sub>-CH<sub>2</sub>-CH<sub>2</sub>-CH<sub>3</sub>), 4.05(s, N-CH<sub>3</sub>), 1.93(m, N-CH<sub>2</sub>-CH<sub>2</sub>-CH<sub>2</sub>-CH<sub>3</sub>), 1.40(m, N-CH<sub>2</sub>-CH<sub>2</sub>-CH<sub>2</sub>-CH<sub>3</sub>), 0.96(t, N-CH<sub>2</sub>-CH<sub>2</sub>-CH<sub>2</sub>-CH<sub>3</sub>) ppm.

#### c) [EtMe<sub>2</sub>S][N(CN)<sub>2</sub>]

**IR (KBr):** 3016.6m, 2931.2w ( $V_{C-H}$ ), 2240.9s, 2199.3s, 2138.1vs ( $V_{CN}$ )  $cm^{-1}$ .

**<sup>1</sup>H NMR, (600MHz, d<sub>6</sub>-DMSO):**  $\delta$  3.28(q, S-CH<sub>2</sub>-CH<sub>3</sub>), 2.84(s, S-(CH<sub>3</sub>)<sub>2</sub>), 1.34(t, S-CH<sub>2</sub>-CH<sub>3</sub>) ppm.

#### d) [S2][N(CN)<sub>2</sub>]

**IR (KBr):** 2977.2w, 2950.7w, 2879.9w ( $V_{C-H}$ ), 2236.4s, 2196.4s, 2135.0vs ( $V_{CN}$ )  $cm^{-1}$ .

**<sup>1</sup>H NMR, (600MHz, d<sub>6</sub>-DMSO):**  $\delta$  3.74(m, S-CH<sub>2</sub>-CH<sub>2</sub>-), 3.65(m, S-CH<sub>2</sub>-CH<sub>2</sub>-), 3.48(m, S-CH<sub>2</sub>-CH<sub>3</sub>), 2.47(m, S-CH<sub>2</sub>-CH<sub>2</sub>-), 2.40(m, S-CH<sub>2</sub>-CH<sub>2</sub>-), 1.53(t, S-CH<sub>2</sub>-CH<sub>3</sub>) ppm.

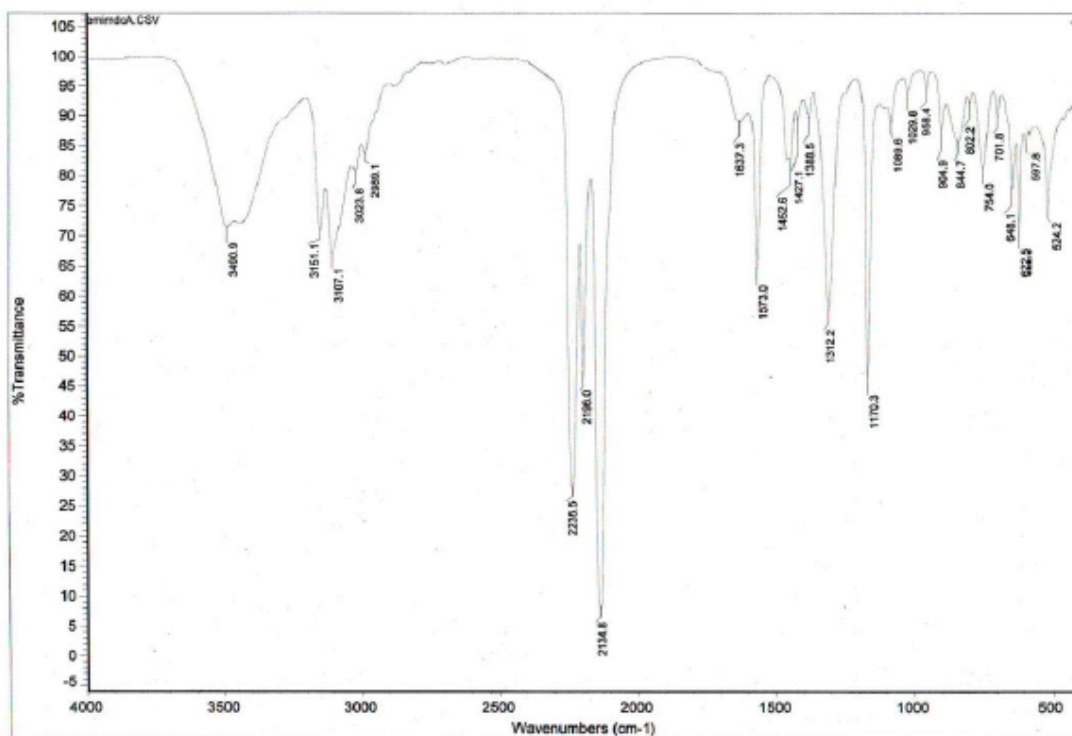

Fig. 1 FT-IR for [EMI][N(CN)<sub>2</sub>]

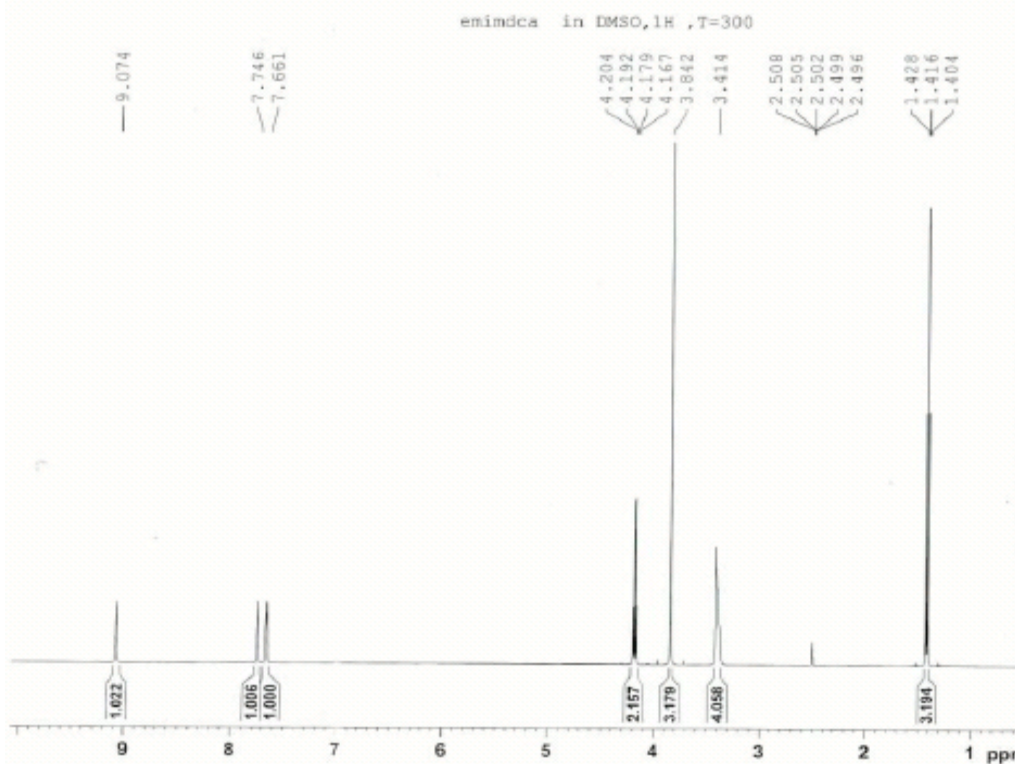

Fig. 2 <sup>1</sup>H NMR for [EMI][N(CN)<sub>2</sub>]

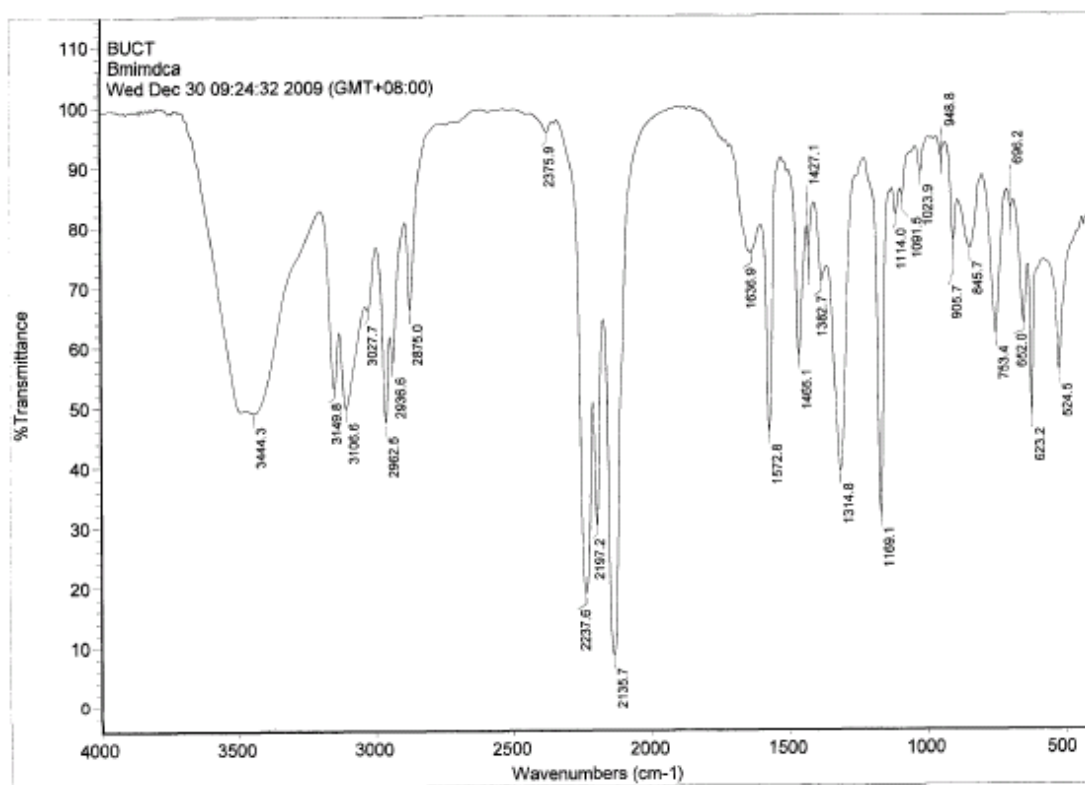

Fig. 3 FT-IR for [BMI][N(CN)<sub>2</sub>]

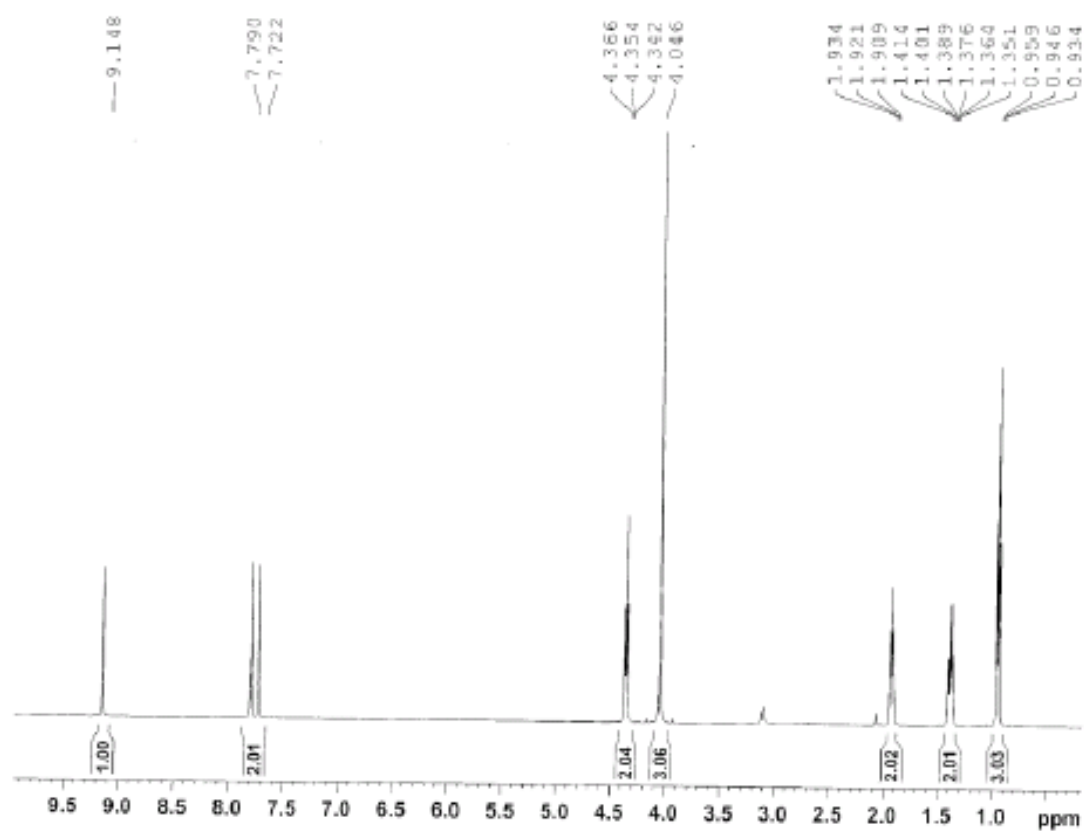

Fig. 4 <sup>1</sup>H NMR for [BMI][N(CN)<sub>2</sub>]

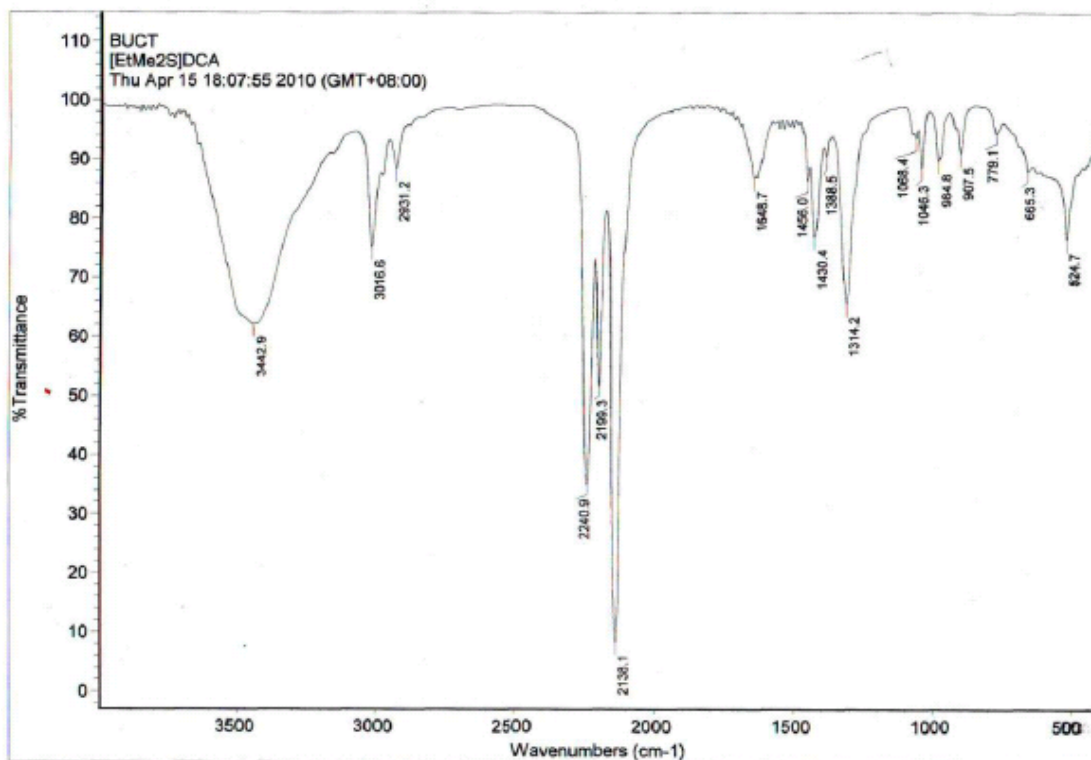

Fig. 5 FT-IR for [EtMe<sub>2</sub>S][N(CN)<sub>2</sub>]

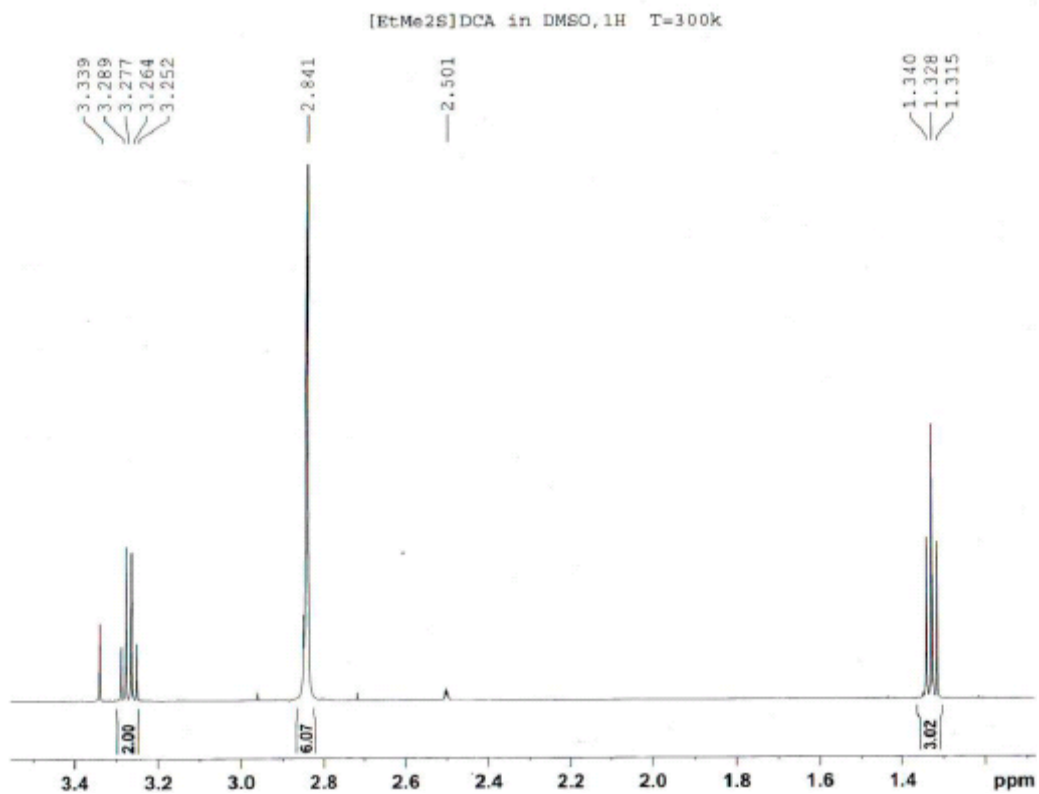

Fig. 6 <sup>1</sup>H NMR for [EtMe<sub>2</sub>S][N(CN)<sub>2</sub>]

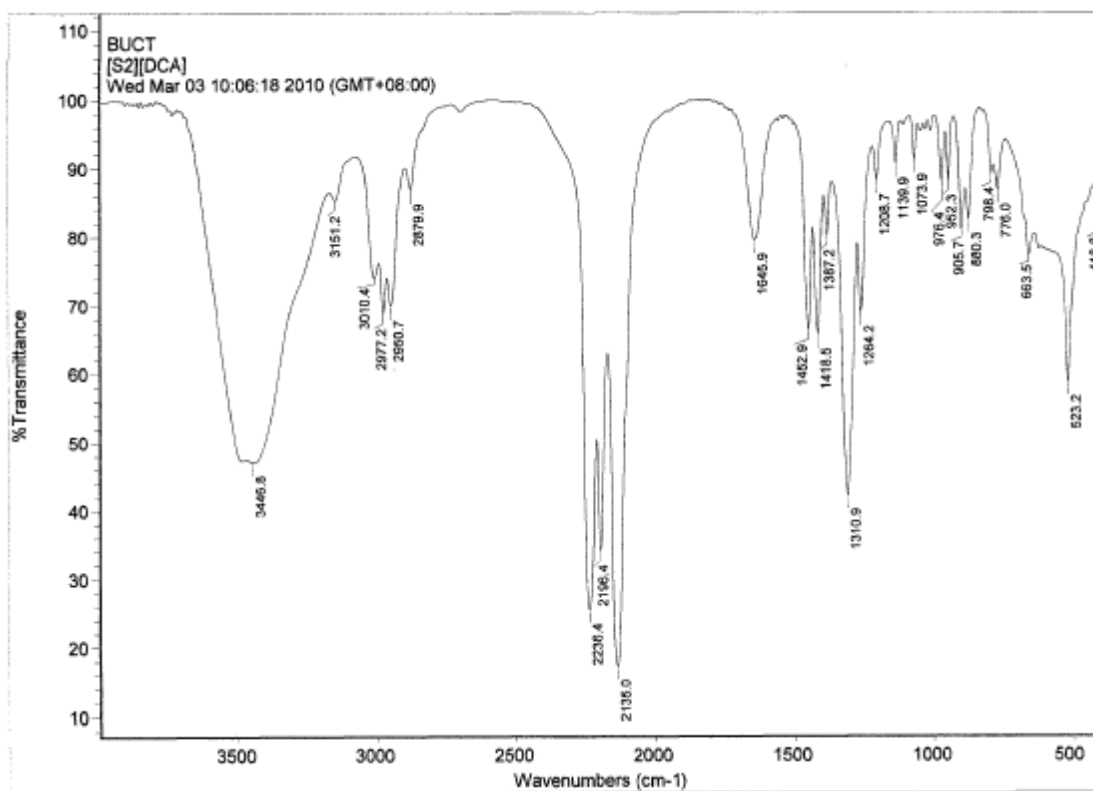

Fig. 7 FT-IR for [S2][N(CN)<sub>2</sub>]

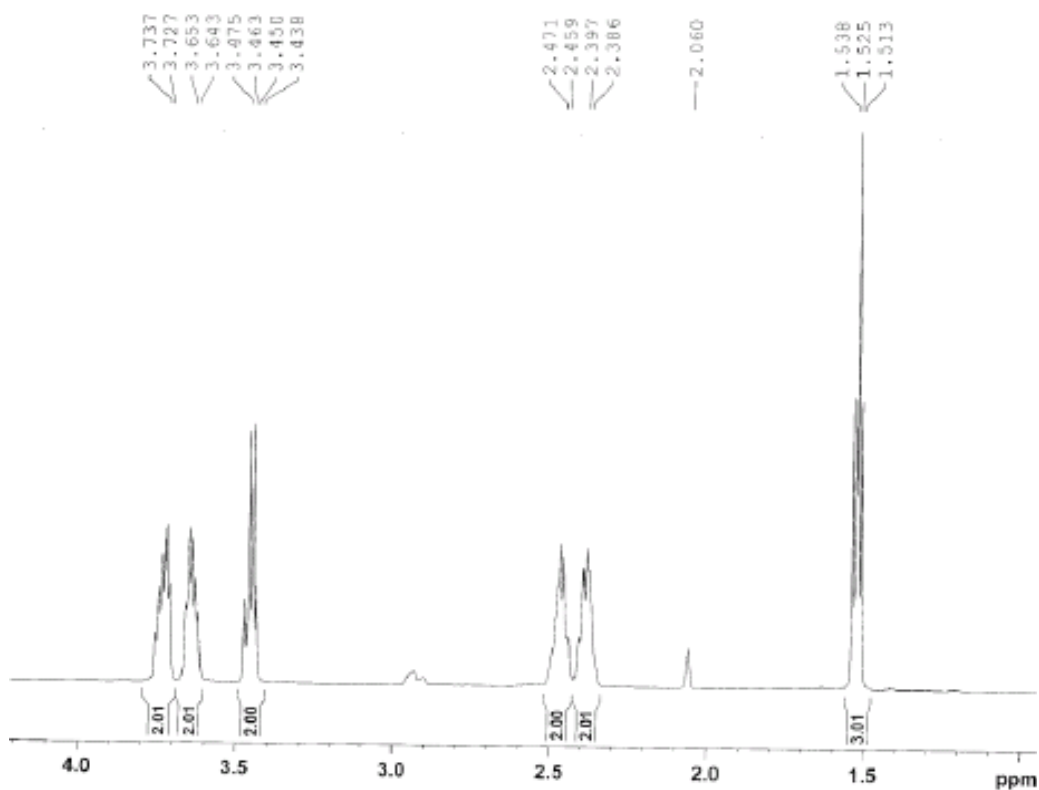

Fig. 8 <sup>1</sup>H NMR for [S2][N(CN)<sub>2</sub>]
